# Supplementary material for: Efficacy and Safety of Plasma Exchange as an Adjunctive Therapy for Rapidly Progressive IgA Nephropathy and Henoch-Schönlein Purpura Nephritis: A Systematic Review
Source: MDPI journal article supplement (doi:10.3390/ijms24043977), 2023-02-16
Supplement: s1 [file s1]

|                            | Does the patient represent the whole experience of the investigators/center? | Was the exposure adequately ascertained? | Was the outcome adequately ascertained? | Were there alternative causes that may explain the observation ruled out? | Was there a challenge/rechallenge phenomenon? | Was there a dose-response effect? | Was follow up long enough for outcomes to occur? | Is the case described with sufficient details to allow other investigators to replicate the research? |
|----------------------------|------------------------------------------------------------------------------|------------------------------------------|-----------------------------------------|---------------------------------------------------------------------------|-----------------------------------------------|-----------------------------------|--------------------------------------------------|-------------------------------------------------------------------------------------------------------|
| <b>Coppo 1985</b>          | Yes                                                                          | Yes                                      | Yes                                     | No                                                                        | n/a                                           | n/a                               | Yes                                              | Yes                                                                                                   |
| <b>Tejeiro 1990</b>        | No                                                                           | Yes                                      | Yes                                     | Yes                                                                       | n/a                                           | n/a                               | Yes                                              | Yes                                                                                                   |
| <b>Streather 1994</b>      | No                                                                           | Yes                                      | Yes                                     | Yes                                                                       | n/a                                           | n/a                               | Yes                                              | Yes                                                                                                   |
| <b>Affessa 1997</b>        | Yes                                                                          | Yes                                      | Yes                                     | Yes                                                                       | n/a                                           | n/a                               | Yes                                              | Yes                                                                                                   |
| <b>McGregor 1998</b>       | Yes                                                                          | Yes                                      | Yes                                     | Yes                                                                       | n/a                                           | n/a                               | Yes                                              | Yes                                                                                                   |
| <b>Chen 2004</b>           | Yes                                                                          | Yes                                      | Yes                                     | Yes                                                                       | n/a                                           | n/a                               | Yes                                              | Yes                                                                                                   |
| <b>Rech 2005</b>           | Yes                                                                          | Yes                                      | Yes                                     | Yes                                                                       | n/a                                           | n/a                               | Yes                                              | Yes                                                                                                   |
| <b>Fujinaga 2006</b>       | Yes                                                                          | Yes                                      | Yes                                     | Yes                                                                       | n/a                                           | n/a                               | Yes                                              | Yes                                                                                                   |
| <b>Anatham 2007</b>        | Yes                                                                          | Yes                                      | Yes                                     | Yes                                                                       | n/a                                           | n/a                               | Yes                                              | Yes                                                                                                   |
| <b>Wang 2011</b>           | Yes                                                                          | Yes                                      | Yes                                     | Yes                                                                       | n/a                                           | n/a                               | Yes                                              | Yes                                                                                                   |
| <b>Pipilli 2012</b>        | Yes                                                                          | Yes                                      | Yes                                     | Yes                                                                       | n/a                                           | n/a                               | Yes                                              | Yes                                                                                                   |
| <b>Herzog 2014</b>         | Yes                                                                          | Yes                                      | Yes                                     | Yes                                                                       | n/a                                           | n/a                               | Yes                                              | Yes                                                                                                   |
| <b>Otsuka 2014</b>         | Yes                                                                          | Yes                                      | Yes                                     | Yes                                                                       | n/a                                           | n/a                               | No                                               | No                                                                                                    |
| <b>Yim 2014</b>            | Yes                                                                          | Yes                                      | Yes                                     | Yes                                                                       | n/a                                           | n/a                               | Yes                                              | No                                                                                                    |
| <b>Hamilton 2015</b>       | Yes                                                                          | Yes                                      | Yes                                     | Yes                                                                       | n/a                                           | n/a                               | Yes                                              | Yes                                                                                                   |
| <b>Ring 2015</b>           | Yes                                                                          | Yes                                      | Yes                                     | Yes                                                                       | n/a                                           | n/a                               | Yes                                              | Yes                                                                                                   |
| <b>Doddi 2016</b>          | Yes                                                                          | Yes                                      | Yes                                     | Yes                                                                       | n/a                                           | n/a                               | No                                               | Yes                                                                                                   |
| <b>Pannu 2016</b>          | Yes                                                                          | Yes                                      | Yes                                     | No                                                                        | n/a                                           | n/a                               | No                                               | No                                                                                                    |
| <b>Nissaisorakarn 2017</b> | No                                                                           | Yes                                      | Yes                                     | Yes                                                                       | n/a                                           | n/a                               | Yes                                              | Yes                                                                                                   |
| <b>Soltanpour 2017</b>     | No                                                                           | Yes                                      | Yes                                     | No                                                                        | n/a                                           | n/a                               | No                                               | No                                                                                                    |
| <b>Vega 2017</b>           | Yes                                                                          | Yes                                      | Yes                                     | Yes                                                                       | n/a                                           | n/a                               | No                                               | No                                                                                                    |
| <b>Surmelidoven 2018</b>   | Yes                                                                          | Yes                                      | Yes                                     | Yes                                                                       | n/a                                           | n/a                               | Yes                                              | Yes                                                                                                   |
| <b>Rajiv 2018</b>          | Yes                                                                          | Yes                                      | Yes                                     | No                                                                        | n/a                                           | n/a                               | No                                               | Yes                                                                                                   |
| <b>Gani 2019</b>           | Yes                                                                          | Yes                                      | Yes                                     | Yes                                                                       | n/a                                           | n/a                               | Yes                                              | Yes                                                                                                   |
| <b>Kojima 2019</b>         | Yes                                                                          | Yes                                      | Yes                                     | Yes                                                                       | n/a                                           | n/a                               | Yes                                              | Yes                                                                                                   |
| <b>Longano 2019</b>        | Yes                                                                          | Yes                                      | Yes                                     | Yes                                                                       | n/a                                           | n/a                               | Yes                                              | Yes                                                                                                   |
| <b>Bhuwania 2020</b>       | No                                                                           | Yes                                      | Yes                                     | Yes                                                                       | n/a                                           | n/a                               | Yes                                              | Yes                                                                                                   |
| <b>Apaydin 2021</b>        | Yes                                                                          | Yes                                      | Yes                                     | Yes                                                                       | n/a                                           | n/a                               | Yes                                              | Yes                                                                                                   |
| <b>Zhang 2021</b>          | Yes                                                                          | Yes                                      | Yes                                     | Yes                                                                       | n/a                                           | n/a                               | Yes                                              | Yes                                                                                                   |

Supplemental Table S1: Methodological quality of included case reports. Tool adapted from *Methodological quality and synthesis of case series and case reports published* in 2018 by Murad et al. (n/a, not applicable)

|                       | Does the patient(s) represent the whole experience of the investigators/center? | Was the exposure adequately ascertained? | Was the outcome adequately ascertained? | Were there alternative causes that may explain the observation ruled out? | Was there a challenge/rechallenge phenomenon? | Was there a dose-response effect? | Was follow up long enough for outcomes to occur? | Is the case described with sufficient details to allow other investigators to replicate the research? |
|-----------------------|---------------------------------------------------------------------------------|------------------------------------------|-----------------------------------------|---------------------------------------------------------------------------|-----------------------------------------------|-----------------------------------|--------------------------------------------------|-------------------------------------------------------------------------------------------------------|
| <b>Lai 1987</b>       | Yes                                                                             | Yes                                      | Yes                                     | No                                                                        | n/a                                           | n/a                               | Yes                                              | Yes                                                                                                   |
| <b>Nicholls 1990</b>  | No                                                                              | Yes                                      | Yes                                     | No                                                                        | n/a                                           | n/a                               | Yes                                              | Yes                                                                                                   |
| <b>Rocatello 1995</b> | No                                                                              | Yes                                      | Yes                                     | No                                                                        | n/a                                           | n/a                               | Yes                                              | Yes                                                                                                   |
| <b>Gianviti 1996</b>  | Yes                                                                             | Yes                                      | Yes                                     | No                                                                        | n/a                                           | n/a                               | Yes                                              | Yes                                                                                                   |
| <b>Shenoy 2007</b>    | Yes                                                                             | Yes                                      | Yes                                     | No                                                                        | n/a                                           | n/a                               | Yes                                              | Yes                                                                                                   |
| <b>Wright 2006</b>    | Yes                                                                             | Yes                                      | Yes                                     | Yes                                                                       | n/a                                           | n/a                               | Yes                                              | Yes                                                                                                   |
| <b>Xie 2016</b>       | Yes                                                                             | Yes                                      | Yes                                     | Yes                                                                       | n/a                                           | n/a                               | Yes                                              | Yes                                                                                                   |
| <b>Chambers 1999</b>  | No                                                                              | Yes                                      | Yes                                     | No                                                                        | n/a                                           | n/a                               | No                                               | Yes                                                                                                   |
| <b>Rajgopala 2017</b> | No                                                                              | Yes                                      | Yes                                     | No                                                                        | n/a                                           | n/a                               | Yes                                              | Yes                                                                                                   |

Supplemental Table S2: Methodological quality of included case series. Tool adapted from *Methodological quality and synthesis of case series and case reports* published in 2018 by Murad et al. (n/a, not applicable)

Murad MH, Sultan S, Haffar S, Bazerbachi F. Methodological quality and synthesis of case series and case reports. *BMJ Evid Based Med*. 2018;23(2):60-63. doi:10.1136/bmjebm-2017-110853
